# Supplementary material for: Patterns of Ancestry, Signatures of Natural Selection, and Genetic Association with Stature in Western African Pygmies
Source: PLoS Genet. 2012 Apr 26;8(4):e1002641. doi: 10.1371/journal.pgen.1002641 (PMC3343053; doi:10.1371/journal.pgen.1002641)
Supplement: Table S1 — High FST SNPs. Position information, FST and association results for the top 100 markers in the empirical distribution of autosomal FST values. Raw p-values for association with height using the IBS matrix from EMMAX in the combined Pygmy-Bantu sample and analysis-specific Benjamini-Hochberg FDR corrected p-values are given. (XLSX) [file pgen.1002641.s009.xlsx]

## Sheet: Table_S1
Table S1: The Top 100 High FST SNPs
rsID	Chr	Pos_36	Pos_37	FST	p_value_PygmyBantu	FDR_PygmyBantu	Genes
rs11130267	3	50999943	51024903	0.579531	0.000323554	0.00762238	DOCK3
rs7614881	3	51013415	51038375	0.579531	0.000227161	0.00651883	DOCK3
rs7638732	3	51050916	51075876	0.579531	0.000227161	0.00651883	DOCK3
rs6795272	3	51082910	51107870	0.579531	0.000227161	0.00651883	DOCK3
rs12494165	3	51111612	51136572	0.579531	0.000227161	0.00651883	DOCK3
rs1842888	12	100015506	101491375	0.569868	0.0882296	0.163314	ANO4;SLC5A8
rs4506820	14	76164901	77095148	0.551994	0.00147945	0.0172275
rs3135946	3	48484040	48509036	0.551044	0.103485	0.177853	FBXW12;PLXNB1;CCDC51;CCDC72;ATRIP;TREX1;SHISA5;PFKFB4;UCN2;COL7A1
rs3135937	3	48481226	48506222	0.549648	0.0516903	0.123301	FBXW12;PLXNB1;CCDC51;CCDC72;ATRIP;TREX1;SHISA5;PFKFB4;UCN2;COL7A1
rs10840674	12	17251521	17360254	0.549648	0.25746	0.34588
rs2676622	9	114494325	115454504	0.546738	0.00472082	0.0334772	KIAA1958;C9orf80;SNX30
rs11889063	2	75520148	75666640	0.539735	0.125265	0.202035	FAM176A;GAPDHP57
rs11925638	3	48466572	48491568	0.539735	0.0538285	0.126177	FBXW12;PLXNB1;CCDC51;CCDC72;ATRIP;TREX1;SHISA5;PFKFB4
rs11918058	3	48466761	48491757	0.539735	0.0538285	0.126177	FBXW12;PLXNB1;CCDC51;CCDC72;ATRIP;TREX1;SHISA5;PFKFB4
rs107457	3	50612998	50637994	0.538336	0.0384109	0.10636	CACNA2D2;C3orf18;HEMK1;CISH;MAPKAPK3;DOCK3
rs7626978	3	48480835	48505831	0.530563	0.0746367	0.150492	FBXW12;PLXNB1;CCDC51;CCDC72;ATRIP;TREX1;SHISA5;PFKFB4;UCN2;COL7A1
rs3762760	3	3163016	3188016	0.520529	0.0808736	0.156703	TRNT1;CRBN;CNTN4;IL5RA;CNTN4-AS1
rs10860579	12	99238634	100714503	0.520529	0.0169395	0.0691452	ACTR6;DEPDC4;SCYL2;SLC17A8
rs11917677	3	48444109	48469105	0.51611	0.0572508	0.128836	SPINK8;FBXW12;PLXNB1;CCDC51;CCDC72;ATRIP;TREX1;SHISA5;PFKFB4
rs6475081	9	16774127	16784127	0.514188	0.471071	0.519935	BNC2
rs417592	3	50585700	50610696	0.511333	0.000338623	0.00762238	CACNA2D2;C3orf18;HEMK1;CISH;MAPKAPK3
rs8063288	16	31501271	31593770	0.5047	0.00148762	0.0172275	SLC5A2;C16orf58;AHSP;VN1R64P;VN1R66P
rs9878120	3	NA	50926498	0.5047	8.77e-05	0.00593228	ST13P14;DOCK3
rs7611428	3	50723602	50748598	0.503782	0.000605665	0.0110301	ZNF652P1;CISH;MAPKAPK3;DOCK3
rs7652715	3	50738038	50763034	0.503782	0.000605665	0.0110301	ZNF652P1;MAPKAPK3;DOCK3
rs9868870	3	50952179	50977139	0.503782	0.000605665	0.0110301	ST13P14;DOCK3
rs12487957	3	51729156	51754116	0.501189	0.00664819	0.0392864	RAD54L2;TEX264;GRM2;IQCF6;IQCF1;IQCF3;RN5S132
rs9456318	6	158877092	158957104	0.501189	0.00528339	0.0359954	TATDN2P2;TULP4;TMEM181
rs2686768	19	49687830	44995990	0.498325	0.0266042	0.087177	CEACAM20;CEACAM22P;ZFP112;ZNF285;ZNF229;ZNF180
rs4802808	19	56735204	52043392	0.493265	0.0466449	0.116796	SIGLEC8;CEACAM18;SIGLEC12;SIGLEC6;ZNF175;SIGLEC5;RPL9P33
rs7523335	1	8102797	8180210	0.491922	0.571303	0.609949	ERRFI1
rs9944943	18	42319341	44065343	0.491016	0.000192923	0.00651883	RNF165;LOXHD1
rs2242160	5	76750887	76715131	0.489078	0.00198849	0.020369	PDE8B;WDR41
rs11074509	16	22173904	22266403	0.488418	0.0339103	0.0979055	VWA3A;SDR42E2;EEF2K;POLR3E;CDR2
rs6745920	2	101512093	102145661	0.488094	0.245366	0.334333	RFX8
rs6808458	3	48303476	48328472	0.487895	0.0874706	0.163314	MRPS18AP1;CDC25A;CAMP;ZNF589;NME6;SPINK8;FBXW12;MIR2115
rs6799213	3	51079955	51104915	0.486831	0.00557596	0.0367947	DOCK3
rs11191447	10	104642313	104652323	0.486331	0.0113418	0.0541677	CYP17A1-AS1;PFN1P11;C10orf26;CYP17A1;C10orf32;AS3MT;CNNM2
rs4417049	1	90514159	90741571	0.481559	0.216254	0.302948
rs786978	9	114500060	115460239	0.481559	0.0237911	0.0837865	KIAA1958;C9orf80;SNX30
rs2185768	9	114502466	115462645	0.481559	0.0237911	0.0837865	KIAA1958;C9orf80;SNX30
rs11883942	2	127012592	127296122	0.479914	0.00357797	0.0289601	YWHAZP2
rs2293164	19	49672054	44980214	0.479914	0.0477195	0.117378	CEACAM20;CEACAM22P;ZFP112;ZNF285;ZNF229;ZNF180
rs2020083	19	49673365	44981525	0.479914	0.0477195	0.117378	CEACAM20;CEACAM22P;ZFP112;ZNF285;ZNF229;ZNF180
rs2686775	19	49691899	45000059	0.479914	0.0477195	0.117378	CEACAM20;CEACAM22P;ZFP112;ZNF285;ZNF229;ZNF180
rs4880201	9	139114886	139995065	0.476868	0.0315497	0.094251	TMEM210;ABCA2;C9orf139;DPP7;FUT7;NPDC1;ENTPD2;C9orf140;UAP1L1;GRIN1;MAN1B1;LRRC26;ANAPC2;SSNA1;TPRN
rs666233	2	72455896	72602388	0.47651	0.0501289	0.121412	EXOC6B
rs6686359	1	57129168	57356580	0.470234	0.493965	0.540792	C1orf168;C8A;C8B
rs6810241	3	50976171	51001131	0.470098	0.00678744	0.0392864	ST13P14;DOCK3
rs10865962	3	51018202	51043162	0.470098	0.00678744	0.0392864	DOCK3
rs7629420	3	51065020	51089980	0.470098	0.00678744	0.0392864	DOCK3
rs4511931	3	51071277	51096237	0.470098	0.00678744	0.0392864	DOCK3
rs4586853	3	51077879	51102839	0.470098	0.00678744	0.0392864	DOCK3
rs164439	5	100865225	100837326	0.468804	0.0472045	0.117378
rs11738313	5	76752461	76716705	0.468084	0.0236232	0.0837865	PDE8B;WDR41
rs11918800	3	52843185	52868145	0.457235	0.00781099	0.0425115	ITIH4-AS1;NEK4;ITIH1;ITIH3;ITIH4;MUSTN1;TMEM110-MUSTN1;TMEM110;SFMBT1
rs11922961	3	52843650	52868610	0.457235	0.00781099	0.0425115	ITIH4-AS1;NEK4;ITIH1;ITIH3;ITIH4;MUSTN1;TMEM110-MUSTN1;TMEM110;SFMBT1
rs704177	12	21884539	21993272	0.457235	0.0647161	0.138579	LDHB;KCNJ8;ABCC9
rs12172730	1	104913058	105111535	0.457074	0.213045	0.300229
rs12115325	9	139121799	140001978	0.457074	0.0299377	0.0908686	TMEM210;ABCA2;C9orf139;DPP7;FUT7;NPDC1;ENTPD2;C9orf140;UAP1L1;GRIN1;MAN1B1;LRRC26;ANAPC2;SSNA1;TPRN;TMEM203;NDOR1
rs12498329	4	119530972	119311524	0.453951	0.0323519	0.0954431	CEP170P1;PRSS12
rs11921011	3	50831091	50856087	0.453582	0.00678744	0.0392864	ZNF652P1;ST13P14;DOCK3
rs2085580	3	50841577	50866573	0.453582	0.00678744	0.0392864	ZNF652P1;ST13P14;DOCK3
rs7642158	3	50872333	50897315	0.453582	0.00678744	0.0392864	ZNF652P1;ST13P14;DOCK3
rs2219433	3	50875121	50900103	0.453582	0.00678744	0.0392864	ZNF652P1;ST13P14;DOCK3
rs4142175	14	76155660	77085907	0.453231	0.010669	0.0518131
rs536787	1	37110312	37337725	0.449436	0.0904766	0.165071	GRIK3
rs831748	1	199400578	201133955	0.448406	0.036485	0.103447	CACNA1S;TMEM9;IGFN1
rs1214780	2	47756289	47902785	0.448406	0.0280572	0.0882729
rs9564590	13	69162578	70264577	0.448406	0.0421946	0.110944	KLHL1
rs4658367	1	90479854	90707266	0.448114	0.454423	0.505093
rs9317600	13	66145880	67247879	0.447696	0.00493138	0.0340877	PCDH9;RNU7-87P
rs11664616	18	54427680	56276700	0.447696	0.0256418	0.0861423	ALPK2;MALT1
rs1124742	5	76753943	76718187	0.44755	0.0378266	0.105049	PDE8B;WDR41
rs3751913	17	77998841	80405552	0.44755	5.06e-05	0.00399318	TEX19;UTS2R;C17orf101;HEXDC;C17orf62;NARF;FOXK2
rs12428841	13	57289492	58391491	0.444453	0.018656	0.0733079	PCDH17;TRNAE39P
rs13289196	9	16771184	16781184	0.443636	0.399073	0.459143	BNC2
rs6532349	4	93108449	92889426	0.442612	0.0263676	0.0870038
rs7157447	14	92071325	93001572	0.442389	0.0160673	0.0663636	SLC24A4;RIN3
rs11905679	20	14902943	14954943	0.442389	0.0300753	0.0909947	MACROD2-AS1;MACROD2
rs910	9	12700035	12710035	0.442389	0.0296624	0.0906138	TYRP1;C9orf150
rs6779819	3	50694349	50719345	0.439467	2.99e-05	0.00283153	HEMK1;CISH;MAPKAPK3;DOCK3
rs6796769	3	50698931	50723927	0.439467	2.99e-05	0.00283153	CISH;MAPKAPK3;DOCK3
rs7615703	3	50707406	50732402	0.439467	2.99e-05	0.00283153	ZNF652P1;CISH;MAPKAPK3;DOCK3
rs6446213	3	50724269	50749265	0.439467	2.99e-05	0.00283153	ZNF652P1;MAPKAPK3;DOCK3
rs11712367	3	50750450	50775446	0.439467	2.99e-05	0.00283153	ZNF652P1;MAPKAPK3;DOCK3
rs6446222	3	50812087	50837083	0.439467	2.99e-05	0.00283153	ZNF652P1;ST13P14;DOCK3
rs9869945	3	50824372	50849368	0.439467	2.99e-05	0.00283153	ZNF652P1;ST13P14;DOCK3
rs7433217	3	50962234	50987194	0.439467	2.99e-05	0.00283153	ST13P14;DOCK3
rs9919410	10	1892486	1902486	0.437884	0.000107424	0.00598415
rs738798	22	22488149	24158149	0.437884	0.0649844	0.138579	GUSBP11;ZNF70;VPREB3;C22orf15;CHCHD10;MMP11;SMARCB1;DERL3;SLC2A11;MIF
rs10185826	2	72991499	73137991	0.437884	0.00220514	0.0208827	SPR;EMX1;SFXN5;EXOC6B
rs201194	3	50617979	50642975	0.437285	0.0143369	0.062439	C3orf18;HEMK1;CISH;MAPKAPK3;DOCK3
rs10902963	10	124534564	124544574	0.437169	0.0121587	0.0558946	C10orf120;CUZD1;FAM24B
rs11248601	10	124534801	124544811	0.437169	0.0121587	0.0558946	C10orf120;CUZD1;FAM24B
rs7264266	20	14897763	14949763	0.437169	0.00563661	0.0367947	MACROD2-AS1;MACROD2
rs4687790	3	51928748	51953708	0.435894	0.010543	0.0517315	IQCF5-AS1;ABHD14A-ACY1;IQCF1;IQCF3;IQCF2;IQCF5;RRP9;PARP3;GPR62;PCBP4;ABHD14B;ABHD14A;ACY1;RPL29
rs2071042	3	52839624	52864584	0.434554	0.00772135	0.0425115	ITIH4-AS1;NEK4;ITIH1;ITIH3;ITIH4;MUSTN1;TMEM110-MUSTN1;TMEM110;SFMBT1
rs7652667	3	52841575	52866535	0.434554	0.00772135	0.0425115	ITIH4-AS1;NEK4;ITIH1;ITIH3;ITIH4;MUSTN1;TMEM110-MUSTN1;TMEM110;SFMBT1
rs829079	12	21890375	21999108	0.434554	0.0588492	0.130009	LDHB;KCNJ8;ABCC9
