# Supplementary material for: Patterns of Ancestry, Signatures of Natural Selection, and Genetic Association with Stature in Western African Pygmies
Source: PLoS Genet. 2012 Apr 26;8(4):e1002641. doi: 10.1371/journal.pgen.1002641 (PMC3343053; doi:10.1371/journal.pgen.1002641)
Supplement: Table S2 — High Pygmy LSBL SNPs. Position information, LSBL and association results for the top 100 SNPs in the empirical distribution of autosomal LSBL values. Raw p-values for association with height using the IBS matrix from EMMAX in the combined Pygmy-Bantu sample and analysis-specific Benjamini-Hochberg FDR corrected p-values are given. (XLSX) [file pgen.1002641.s010.xlsx]

## Sheet: Table_S2
Table S2: The Top 100 High LSBL SNPs
rsID	Chr	Pos_36	Pos_37	Pygmy_LSBL	p_value_PygmyBantu	FDR_PygmyBantu	Genes
rs107457	3	50612998	50637994	0.416744	0.0384109	0.118039	CACNA2D2;C3orf18;HEMK1;CISH;MAPKAPK3;DOCK3
rs10840674	12	17251521	17360254	0.406977	0.25746	0.35527
rs7523335	1	8102797	8180210	0.399186	0.571303	0.636954	ERRFI1
rs6475081	9	16774127	16784127	0.397886	0.471071	0.551498	BNC2
rs3135937	3	48481226	48506222	0.386856	0.0516903	0.138651	FBXW12;PLXNB1;CCDC51;CCDC72;ATRIP;TREX1;SHISA5;PFKFB4;UCN2;COL7A1
rs7611428	3	50723602	50748598	0.383706	0.000605665	0.0117525	ZNF652P1;CISH;MAPKAPK3;DOCK3
rs7652715	3	50738038	50763034	0.383706	0.000605665	0.0117525	ZNF652P1;MAPKAPK3;DOCK3
rs9868870	3	50952179	50977139	0.383706	0.000605665	0.0117525	ST13P14;DOCK3
rs3135946	3	48484040	48509036	0.374071	0.103485	0.202152	FBXW12;PLXNB1;CCDC51;CCDC72;ATRIP;TREX1;SHISA5;PFKFB4;UCN2;COL7A1
rs7626978	3	48480835	48505831	0.373804	0.0746367	0.170676	FBXW12;PLXNB1;CCDC51;CCDC72;ATRIP;TREX1;SHISA5;PFKFB4;UCN2;COL7A1
rs12487957	3	51729156	51754116	0.373598	0.00664819	0.0476165	RAD54L2;TEX264;GRM2;IQCF6;IQCF1;IQCF3;RN5S132
rs6799213	3	51079955	51104915	0.37137	0.00557596	0.0460269	DOCK3
rs11130267	3	50999943	51024903	0.370961	0.000323554	0.0077653	DOCK3
rs7614881	3	51013415	51038375	0.368428	0.000227161	0.00609326	DOCK3
rs7638732	3	51050916	51075876	0.368428	0.000227161	0.00609326	DOCK3
rs6795272	3	51082910	51107870	0.368428	0.000227161	0.00609326	DOCK3
rs12494165	3	51111612	51136572	0.368428	0.000227161	0.00609326	DOCK3
rs11917677	3	48444109	48469105	0.363052	0.0572508	0.146448	SPINK8;FBXW12;PLXNB1;CCDC51;CCDC72;ATRIP;TREX1;SHISA5;PFKFB4
rs11925638	3	48466572	48491568	0.362308	0.0538285	0.142294	FBXW12;PLXNB1;CCDC51;CCDC72;ATRIP;TREX1;SHISA5;PFKFB4
rs11918058	3	48466761	48491757	0.362308	0.0538285	0.142294	FBXW12;PLXNB1;CCDC51;CCDC72;ATRIP;TREX1;SHISA5;PFKFB4
rs6808458	3	48303476	48328472	0.361748	0.0874706	0.186137	MRPS18AP1;CDC25A;CAMP;ZNF589;NME6;SPINK8;FBXW12;MIR2115
rs4506820	14	76164901	77095148	0.359993	0.00147945	0.0195545
rs536787	1	37110312	37337725	0.352124	0.0904766	0.187407	GRIK3
rs201194	3	50617979	50642975	0.351606	0.0143369	0.0728267	C3orf18;HEMK1;CISH;MAPKAPK3;DOCK3
rs6810241	3	50976171	51001131	0.34932	0.00678744	0.0476165	ST13P14;DOCK3
rs10865962	3	51018202	51043162	0.34932	0.00678744	0.0476165	DOCK3
rs7629420	3	51065020	51089980	0.34932	0.00678744	0.0476165	DOCK3
rs4511931	3	51071277	51096237	0.34932	0.00678744	0.0476165	DOCK3
rs4586853	3	51077879	51102839	0.34932	0.00678744	0.0476165	DOCK3
rs13289196	9	16771184	16781184	0.348419	0.399073	0.480786	BNC2
rs11664616	18	54427680	56276700	0.346299	0.0256418	0.0972933	ALPK2;MALT1
rs11921011	3	50831091	50856087	0.342258	0.00678744	0.0476165	ZNF652P1;ST13P14;DOCK3
rs2085580	3	50841577	50866573	0.342258	0.00678744	0.0476165	ZNF652P1;ST13P14;DOCK3
rs7642158	3	50872333	50897315	0.342258	0.00678744	0.0476165	ZNF652P1;ST13P14;DOCK3
rs7601170	2	84342806	84489295	0.338658	0.00452731	0.041289	FUNDC2P2
rs7558867	2	84351286	84497775	0.338658	0.00452731	0.041289	FUNDC2P2
rs2676622	9	114494325	115454504	0.336875	0.00472082	0.0419432	KIAA1958;C9orf80;SNX30
rs2648868	8	129133990	129064808	0.334135	0.0883914	0.186137	PVT1;MIR1205;MIR1207;MIR1208
rs2242160	5	76750887	76715131	0.330148	0.00198849	0.0246527	PDE8B;WDR41
rs6763010	3	48197462	48222458	0.327672	0.600134	0.662161	SNRPFP4;NDUFB1P1;MRPS18AP1;MAP4;CDC25A;CAMP;ZNF589
rs11905679	20	14902943	14954943	0.326945	0.0300753	0.101965	MACROD2-AS1;MACROD2
rs4142175	14	76155660	77085907	0.326733	0.010669	0.0615831
rs17424278	1	57618982	57846394	0.326575	0.0832566	0.181651	DAB1
rs4687790	3	51928748	51953708	0.326204	0.010543	0.0615831	IQCF5-AS1;ABHD14A-ACY1;IQCF1;IQCF3;IQCF2;IQCF5;RRP9;PARP3;GPR62;PCBP4;ABHD14B;ABHD14A;ACY1;RPL29
rs16996358	4	93826080	93607057	0.325641	0.0141676	0.0728267	MTND1P19;GRID2
rs738798	22	22488149	24158149	0.325415	0.0649844	0.154148	GUSBP11;ZNF70;VPREB3;C22orf15;CHCHD10;MMP11;SMARCB1;DERL3;SLC2A11;MIF
rs1499040	11	88035825	88396177	0.323452	0.443626	0.524153	GRM5
rs11734837	4	93840443	93621420	0.322476	0.0116571	0.0648247	MTND1P19;GRID2
rs10452029	3	48609576	48634572	0.32162	0.14628	0.23947	SHISA5;PFKFB4;UCN2;COL7A1;UQCRC1;TMEM89;SLC26A6;CELSR3;NCKIPSD;IP6K2;MIR711
rs417592	3	50585700	50610696	0.321134	0.000338623	0.00791857	CACNA2D2;C3orf18;HEMK1;CISH;MAPKAPK3
rs4880201	9	139114886	139995065	0.320197	0.0315497	0.106175	TMEM210;ABCA2;C9orf139;DPP7;FUT7;NPDC1;ENTPD2;C9orf140;UAP1L1;GRIN1;MAN1B1;LRRC26;ANAPC2;SSNA1;TPRN
rs4596728	9	20660187	20670187	0.317618	0.27661	0.370982	MLLT3;KIAA1797;MIR491
rs9878120	3	NA	50926498	0.317589	8.77e-05	0.00515635	ST13P14;DOCK3
rs2185768	9	114502466	115462645	0.314315	0.0237911	0.0939283	KIAA1958;C9orf80;SNX30
rs786978	9	114500060	115460239	0.313976	0.0237911	0.0939283	KIAA1958;C9orf80;SNX30
rs9889052	16	22219599	22312098	0.313913	0.110443	0.207999	EEF2K;POLR3E;CDR2
rs9317600	13	66145880	67247879	0.313638	0.00493138	0.0432444	PCDH9;RNU7-87P
rs1334391	13	65747208	66849207	0.312985	0.101654	0.200234	TRIM60P19;PCDH9-AS1;PCDH9
rs7264266	20	14897763	14949763	0.312689	0.00563661	0.0460269	MACROD2-AS1;MACROD2
rs12643444	4	93846042	93627019	0.310699	0.0908884	0.187407	MTND1P19;GRID2
rs1842888	12	100015506	101491375	0.310135	0.0882296	0.186137	ANO4;SLC5A8
rs11889063	2	75520148	75666640	0.309755	0.125265	0.216117	FAM176A;GAPDHP57
rs16859660	2	172198134	172489888	0.30817	0.268713	0.363061	CYBRD1;DYNC1I2
rs6686359	1	57129168	57356580	0.308034	0.493965	0.573881	C1orf168;C8A;C8B
rs4813127	20	13314624	13366624	0.307702	0.247026	0.346064	GAPDHP2;ISM1;TASP1
rs11738313	5	76752461	76716705	0.307652	0.0236232	0.0939283	PDE8B;WDR41
rs11074509	16	22173904	22266403	0.307581	0.0339103	0.112051	VWA3A;SDR42E2;EEF2K;POLR3E;CDR2
rs9456318	6	158877092	158957104	0.307495	0.00528339	0.04589	TATDN2P2;TULP4;TMEM181
rs12115325	9	139121799	140001978	0.306713	0.0299377	0.101878	TMEM210;ABCA2;C9orf139;DPP7;FUT7;NPDC1;ENTPD2;C9orf140;UAP1L1;GRIN1;MAN1B1;LRRC26;ANAPC2;SSNA1;TPRN;TMEM203;NDOR1
rs7157447	14	92071325	93001572	0.306076	0.0160673	0.0746168	SLC24A4;RIN3
rs4977446	9	18796927	18806927	0.305918	0.242209	0.343003	ADAMTSL1
rs10418939	19	14514720	14653720	0.303224	0.149861	0.241899	PKN1;PTGER1;GIPC1;DNAJB1;TECR;NDUFB7;CLEC17A;EMR3;MIR639
rs7538813	1	113497962	113696439	0.302844	0.131291	0.221736	RLIMP2;LRIG2
rs3762760	3	3163016	3188016	0.302575	0.0808736	0.179116	TRNT1;CRBN;CNTN4;IL5RA;CNTN4-AS1
rs10860579	12	99238634	100714503	0.302575	0.0169395	0.0776322	ACTR6;DEPDC4;SCYL2;SLC17A8
rs11883942	2	127012592	127296122	0.301618	0.00357797	0.0383895	YWHAZP2
rs1940995	18	5633417	5643417	0.301235	0.9195	0.930726	EPB41L3
rs8004143	14	60734292	61664539	0.300768	0.00412183	0.0405283	PRKCH;TMEM30B
rs10510759	3	52582328	52607288	0.300115	0.0144394	0.0728267	NISCH;STAB1;NT5DC2;C3orf78;PBRM1
rs4831975	2	84544056	84690545	0.300115	0.0427404	0.126538	SUCLG1;DNAH6
rs679598	11	79338595	79660947	0.300106	0.780422	0.813422
rs7769547	6	39156735	39048757	0.29931	0.713696	0.76306	GLP1R;C6orf64;DNAH8
rs4662721	2	127818888	128102418	0.298881	0.00426614	0.0405283	ERCC3;MAP3K2;PROC;IWS1
rs4662724	2	127854031	128137561	0.298881	0.00426614	0.0405283	ERCC3;MAP3K2;PROC;IWS1
rs1893922	11	75555689	75878041	0.298592	0.403101	0.484359	UVRAG;WNT11
rs357373	7	137633543	137983003	0.297178	0.459686	0.538861
rs4627772	3	47207793	47232789	0.296545	0.29293	0.383839	SETD2;KIF9;KLHL18
rs10902963	10	124534564	124544574	0.296354	0.0121587	0.0663996	C10orf120;CUZD1;FAM24B
rs11248601	10	124534801	124544811	0.296354	0.0121587	0.0663996	C10orf120;CUZD1;FAM24B
rs13429925	2	127790903	128074433	0.296135	0.00426614	0.0405283	CYP27C1;ERCC3;MAP3K2
rs6430937	2	127798702	128082232	0.296135	0.00426614	0.0405283	ERCC3;MAP3K2;PROC
rs7838021	8	116804983	116735809	0.296079	0.0217683	0.0902396	TRPS1
rs35911561	3	52697602	52722562	0.295689	0.0144394	0.0728267	PBRM1;GNL3;GLT8D1;SPCS1;NEK4;ITIH1;SNORD19;SNORD19B;SNORD69
rs608961	3	50653005	50678001	0.292933	0.013484	0.0702711	C3orf18;HEMK1;CISH;MAPKAPK3;DOCK3
rs1124742	5	76753943	76718187	0.292509	0.0378266	0.118039	PDE8B;WDR41
rs12650479	4	122383002	122163552	0.29233	0.16681	0.260498	TNIP3;QRFPR
rs9878950	3	48583510	48608506	0.291543	0.0768579	0.173986	TREX1;SHISA5;PFKFB4;UCN2;COL7A1;UQCRC1;TMEM89;SLC26A6;CELSR3;NCKIPSD;MIR711
rs11005784	10	58827227	59157221	0.291341	0.219017	0.31857
rs13392963	2	133808119	134091649	0.291332	0.0271492	0.0972933	NCKAP5-IT1;NCKAP5
rs12221064	10	104667116	104677126	0.290977	0.0978862	0.194493	CYP17A1-AS1;PFN1P11;CYP17A1;C10orf32;AS3MT;CNNM2
