# Supplementary material for: Patterns of Ancestry, Signatures of Natural Selection, and Genetic Association with Stature in Western African Pygmies
Source: PLoS Genet. 2012 Apr 26;8(4):e1002641. doi: 10.1371/journal.pgen.1002641 (PMC3343053; doi:10.1371/journal.pgen.1002641)
Supplement: Table S7 — PANTHER enrichment analysis. Results are given for genes residing 100 kb up- and downstream of signatures of positive selection and association. Significant results for enrichment near SNPs in the 99.9% tails of the empirical distribution for A) high Pygmy LSBL SNPs, B) XP-EHH SNPs in Pygmies, C) iHS SNPs in Pygmies, D) enrichment for genes 100 kb up- and downstream of SNPs showing raw p-values in the genome-wide EMMAX analysis less than 0.001 in the combined Pygmy-Bantu dataset, E) raw p-values less than 0.001 in the Pygmy-only SNP-based association analyses and F) for similar regions surrounding SupportMix bins with associations less than 0.05. The Insulin/IGF pathway-protein kinase B signaling cascade, as well as several other pathways involved in immunity, glutamate receptor signaling, metabolism, neuro-endocrine signaling, and reproduction appear enriched in admixture association analysis within Pygmies. Analysis-specific bonferroni corrections for multiple tests were calculated by dividing 0.05 by the total number of pathways actually tested, less those pathways that include only 1 gene. All pathways showing raw p-values for enrichment less than 0.05 are shown and those meeting the appropriate multiple test correction threshold are given in bold. (XLSX) [file pgen.1002641.s015.xlsx]

## Sheet: Table_S7
Table S7: PANTHER enrichment for genes 100kb up- and downstream of SNPs showing suggestive p-values in tests of association
A) High Pygmy LSBL SNPs
Pathway	REFLIST (19911)	Genes Observed (1052)	Genes Expected	p-value
Muscarinic acetylcholine receptor 1 and 3 signaling pathway	61	14	3.24	1e-05
Oxytocin receptor mediated signaling pathway	60	13	3.19	3e-05
5HT2 type receptor mediated signaling pathway	69	14	3.66	3e-05
Histamine H1 receptor mediated signaling pathway	47	11	2.5	6e-05
Thyrotropin-releasing hormone receptor signaling pathway	62	12	3.29	0.00016
Alpha adrenergic receptor signaling pathway	32	8	1.7	0.00038
Metabotropic glutamate receptor group III pathway	73	12	3.88	0.00068
Ionotropic glutamate receptor pathway	54	10	2.87	0.00077
B cell activation	82	12	4.35	0.00179
Wnt signaling pathway	317	30	16.83	0.00217
Heterotrimeric G-protein signaling pathway-Gq alpha and Go alpha mediated pathway	134	16	7.11	0.00271
Metabotropic glutamate receptor group I pathway	36	7	1.91	0.00352
Huntington disease	167	17	8.87	0.00942
Endothelin signaling pathway	91	11	4.83	0.0107
Alzheimer disease-amyloid secretase pathway	71	9	3.77	0.0151
Blood coagulation	48	7	2.55	0.0154
Inflammation mediated by chemokine and cytokine signaling pathway	283	24	15.02	0.019
Muscarinic acetylcholine receptor 2 and 4 signaling pathway	62	8	3.29	0.0193
p53 pathway	113	12	6	0.0197
VEGF signaling pathway	75	9	3.98	0.0206
Metabotropic glutamate receptor group II pathway	51	7	2.71	0.0207
5HT4 type receptor mediated signaling pathway	31	5	1.65	0.0262
Axon guidance mediated by semaphorins	43	6	2.28	0.0289
Beta2 adrenergic receptor signaling pathway	44	6	2.34	0.0318
Beta1 adrenergic receptor signaling pathway	44	6	2.34	0.0318
5HT1 type receptor mediated signaling pathway	44	6	2.34	0.0318
B) XP-EHH SNPs in Pygmies
Pathway	REFLIST (19911)	Genes Observed (156)	Genes Expected	p-value
B cell activation	82	5	0.64	0.000511
Methionine biosynthesis	1	1	0.01	0.0078
T cell activation	102	4	0.8	0.00883
Integrin signaling pathway	181	5	1.42	0.0145
5HT2 type receptor mediated signaling pathway	69	3	0.54	0.0174
Alzheimer disease-amyloid secretase pathway	71	3	0.56	0.0188
Metabotropic glutamate receptor group I pathway	36	2	0.28	0.0329
C) iHS SNPs in Pygmies
Pathway	REFLIST (19911)	Genes Observed (1121)	Genes Expected	p-value
5HT2 type receptor mediated signaling pathway	69	10	3.88	0.00661
Oxytocin receptor mediated signaling pathway	60	9	3.38	0.00787
VEGF signaling pathway	75	10	4.22	0.0114
T cell activation	102	12	5.74	0.0146
Integrin signaling pathway	181	18	10.19	0.0164
EGF receptor signaling pathway	135	14	7.6	0.0234
Thyrotropin-releasing hormone receptor signaling pathway	62	8	3.49	0.0262
Angiogenesis	191	17	10.75	0.0466
D) Enrichment for genes 100kb up- and downstream of SNPs showing raw p-values in the genome-wide EMMAX analysis less than 0.001 in the combined Pygmy-Bantu dataset
Pathway	REFLIST (19911)	Genes Observed (1100)	Genes Expected	p-value
Insulin/IGF pathway-protein kinase B signaling cascade	89	13	4.92	0.0017
Insulin/IGF pathway-mitogen activated protein kinase kinase/MAP kinase cascade	35	6	1.93	0.0142
Alzheimer disease-amyloid secretase pathway	71	9	3.92	0.0189
Methylmalonyl pathway	4	2	0.22	0.0211
Adrenaline and noradrenaline biosynthesis	32	5	1.77	0.034
Nicotinic acetylcholine receptor signaling pathway	97	10	5.36	0.0464
E) Within 100kb of a SNP in Pygmy samples only with p-value < 0.001 using EMMAX
Pathway	REFLIST (19911)	Genes Observed (1041)	Genes Expected	p-value
Inflammation mediated by chemokine and cytokine signaling pathway	283	33	14.8	2.65e-05
Glycolysis	25	8	1.31	6.55e-05
Oxytocin receptor mediated signaling pathway	60	11	3.14	0.000411
5HT2 type receptor mediated signaling pathway	69	11	3.61	0.00126
Thyrotropin-releasing hormone receptor signaling pathway	62	9	3.24	0.0061
Endothelin signaling pathway	91	11	4.76	0.00964
Metabotropic glutamate receptor group I pathway	36	6	1.88	0.0126
De novo pyrmidine ribonucleotides biosythesis	18	4	0.94	0.0155
Ascorbate degradation	4	2	0.21	0.019
Fructose galactose metabolism	12	3	0.63	0.0259
Alpha adrenergic receptor signaling pathway	32	5	1.67	0.0278
Cell cycle	22	4	1.15	0.0295
Beta2 adrenergic receptor signaling pathway	44	6	2.3	0.0298
Beta1 adrenergic receptor signaling pathway	44	6	2.3	0.0298
Alzheimer disease-amyloid secretase pathway	71	8	3.71	0.0355
Histamine H1 receptor mediated signaling pathway	47	6	2.46	0.039
Xanthine and guanine salvage pathway	6	2	0.31	0.04
Angiogenesis	191	16	9.99	0.0474
F) Within 100kb of a SupportMix BIN with p-value < 0.05
Pathway	REFLIST (19911)	Genes Observed (1525)	Genes Expected	p-value
Nicotinic acetylcholine receptor signaling pathway	97	21	7.43	3.19e-05
Inflammation mediated by chemokine and cytokine signaling pathway	283	40	21.68	0.00024
Oxytocin receptor mediated signaling pathway	60	13	4.6	0.00095
Alpha adrenergic receptor signaling pathway	32	9	2.45	0.000983
5HT2 type receptor mediated signaling pathway	69	14	5.28	0.00114
Thyrotropin-releasing hormone receptor signaling pathway	62	12	4.75	0.00361
Histamine H1 receptor mediated signaling pathway	47	10	3.6	0.00397
Insulin/IGF pathway-protein kinase B signaling cascade	89	15	6.82	0.00444
Cytoskeletal regulation by Rho GTPase	98	16	7.51	0.00454
Metabotropic glutamate receptor group I pathway	36	8	2.76	0.0074
TGF-beta signaling pathway	145	20	11.11	0.00995
Alzheimer disease-amyloid secretase pathway	71	12	5.44	0.01
Blood coagulation	48	9	3.68	0.0131
Muscarinic acetylcholine receptor 1 and 3 signaling pathway	61	10	4.67	0.0213
Beta2 adrenergic receptor signaling pathway	44	8	3.37	0.0219
Beta1 adrenergic receptor signaling pathway	44	8	3.37	0.0219
Heterotrimeric G-protein signaling pathway-Gi alpha and Gs alpha mediated pathway	166	20	12.71	0.0348
PI3 kinase pathway	115	15	8.81	0.0351
Huntington disease	167	20	12.79	0.0366
Ascorbate degradation	4	2	0.31	0.0383
Adrenaline and noradrenaline biosynthesis	32	6	2.45	0.0387
Histamine H2 receptor mediated signaling pathway	25	5	1.91	0.0452
