# Supplementary material for: Patterns of Ancestry, Signatures of Natural Selection, and Genetic Association with Stature in Western African Pygmies
Source: PLoS Genet. 2012 Apr 26;8(4):e1002641. doi: 10.1371/journal.pgen.1002641 (PMC3343053; doi:10.1371/journal.pgen.1002641)
Supplement: Table S10 — Admixture mapping results. Association results for the 100 most associated bins using high confidence ancestry estimates from SupportMix. rsID and position information correspond to the first SNP in each 50 SNP bin. Scores and raw p-values using the IBS matrix in EMMAX and analysis-specific FDR corrected p-values along with all genes 100 kb up- and downstream of each of the 50 strongest associations are given. (XLSX) [file pgen.1002641.s018.xlsx]

## Sheet: Table_S10
Table S10: The 100 Strongest Associations between high confidence ancestry estimates from SupportMix and Height Variation
rsID	Chr	Pos_36	Pos_37	Begin_37	End_37	p-value	FDR	Genes
rs219543	2	21389178	21531920	21535673	21678415	1.4e-05	0.30366
rs4690620	4	179435964	179583005	179198970	179346011	7.54e-05	0.641767
rs4742814	9	103266629	103378277	104226808	104338456	0.000145802	0.641767	FYTTD1P1;BAAT;MRPL50;ZNF189;ALDOB;C9orf125;RNF20;GRIN3A;PPP3R2
rs282422	5	67974737	68096315	67938981	68060559	0.000153137	0.641767
rs12504521	4	178621651	178775771	178384657	178538777	0.000163301	0.641767	AGA
rs966108	4	179206987	179422900	178969993	179185906	0.000177529	0.641767
rs2705990	4	179583805	179678994	179346811	179442000	0.000211875	0.65651
rs1226149	9	103186904	103263073	104147083	104223252	0.000260076	0.705131	BAATP1;FYTTD1P1;BAAT;MRPL50;ZNF189;ALDOB;C9orf125;RNF20
rs164396	5	68443472	68561819	68407716	68526063	0.000360686	0.771809	SUMO2P4;CFL1P5;SLC30A5;CCNB1;CENPH;MRPS36;CDK7;CCDC125
rs17066514	4	179776406	179921603	179539412	179684609	0.000484471	0.771809
rs7605304	2	21299074	21380541	21445569	21527036	0.000508661	0.771809
rs4666415	2	20583718	20661221	20720237	20797740	0.000539302	0.771809	HS1BP3-IT1;RHOB;HS1BP3;GDF7;C2orf43
rs2085067	4	178926236	179038473	178689242	178801479	0.000572028	0.771809
rs17066280	4	179689935	179774849	179452941	179537855	0.000584108	0.771809
rs2320625	2	95226463	95358433	95862736	95994706	0.000618922	0.771809	FABP7P2;MRPS5;ZNF514;ZNF2;PROM2;KCNIP3;FAHD2A
rs2561159	5	68760886	70343220	68725130	70307464	0.00066668	0.771809	CHCHD2P2;RPS27P14;GUSBP3;CDH12P2;CDH12P3;GTF2H2B;CDH12P1;CCDC125;TAF9;RAD17;MARVELD2;OCLN;GTF2H2C;SERF1B;SMN2;SERF1A;SMN1;NAIP;GTF2H2
rs2506352	9	103483140	103597353	104443319	104557532	0.000669034	0.771809	MTND3P4;GRIN3A;PPP3R2
rs2972390	5	68565539	68663562	68529783	68627806	0.000674966	0.771809	CFL1P5;CHCHD2P2;CCNB1;CENPH;MRPS36;CDK7;CCDC125;TAF9;RAD17;MARVELD2
rs4505911	5	68277393	68437697	68241637	68401941	0.000750557	0.771809	SUMO2P4;SLC30A5;CCNB1;CENPH
rs10122456	9	103087787	103177639	104047966	104137818	0.000758166	0.771809	BAATP1;FYTTD1P1;BAAT;MRPL50;ZNF189;ALDOB;C9orf125
rs2083643	5	68664685	68760674	68628929	68724918	0.000800944	0.771809	CFL1P5;CHCHD2P2;RPS27P14;GUSBP3;CDK7;CCDC125;TAF9;RAD17;MARVELD2;OCLN
rs10123961	9	103383540	103479191	104343719	104439370	0.0008169	0.771809	C9orf125;RNF20;GRIN3A;PPP3R2
rs16987893	2	20669934	20742301	20806453	20878820	0.000848223	0.771809	HS1BP3-IT1;HS1BP3;GDF7;C2orf43
rs13102468	4	178793717	178923574	178556723	178686580	0.000868854	0.771809
rs6711947	2	139132698	139253731	139416228	139537261	0.000919771	0.771809	SPOPL;NXPH2
rs33287	5	68097500	68260759	68061744	68225003	0.000925175	0.771809
rs2149998	9	109502751	109580956	110462930	110541135	0.00101683	0.815218	RPL36AP6
rs937104	7	153882016	154060493	153882016	154060493	0.00105238	0.815218	DPP6
rs3134105	8	110170859	110361383	110101683	110292207	0.00123962	0.898845	TRHR;NUDCD1;ENY2;PKHD1L1
rs244811	16	82827882	82869064	84270381	84311563	0.00128444	0.898845	HSDL1;DNAAF1;TAF1C;ADAD2;KCNG4;WFDC1;ATP2C2
rs12714214	2	21104872	21292368	21251367	21438863	0.00136267	0.898845	APOB
rs173434	16	82869458	82918034	84311957	84360533	0.00143035	0.898845	DNAAF1;TAF1C;ADAD2;KCNG4;WFDC1;ATP2C2
rs6884358	5	67811463	67966501	67775707	67930745	0.00147592	0.898845
rs28473387	8	143704475	143821485	143707473	143824483	0.00152763	0.898845	JRK;ARC;PSCA;LY6K;C8orf55;SLURP1;LYPD2;LYNX1;LY6D;GML;BAI1
rs7654550	4	48579846	48733108	48885089	49038351	0.00154167	0.898845	TPI1P4;OCIAD2;CWH43;OCIAD1
rs2980618	8	110371174	110534657	110301998	110465481	0.00154458	0.898845	NUDCD1;ENY2;PKHD1L1;EBAG9
rs6989420	8	110011447	110168947	109942271	110099771	0.0015938	0.898845	TRHR
rs10232736	7	152477671	152576737	152846738	152945804	0.00163499	0.898845
rs1026439	8	110543083	110667374	110473907	110598198	0.00167004	0.898845	PKHD1L1;EBAG9;SYBU
rs9310978	3	31801771	31908623	31826767	31933619	0.00169484	0.898845	OSBPL10-AS1;ZNF587P1;OSBPL10;ZNF860
rs748933	15	96711600	96775738	98894077	98958215	0.00169906	0.898845	FAM169B
rs6080387	20	16677262	16761032	16729262	16813032	0.00179532	0.913182	SNRPB2;OTOR
rs4345692	8	143289303	143411764	143291396	143413857	0.00187661	0.913182	LINC00051;TSNARE1
rs11846437	14	31639988	31759307	32570237	32689556	0.00194488	0.913182	ARHGAP5
rs7782578	7	152786095	152916620	153155162	153285687	0.00196766	0.913182
rs4300875	2	97223560	97643463	97859833	98277031	0.0020252	0.913182	ANKRD36B;UBTFL6;FAHD2B;ANKRD36;COX5B;ACTR1B;ZAP70;TMEM131;RNU4-8P
rs184502	3	169678786	169832925	168196092	168350231	0.00209384	0.913182	EGFEM1P;MIR551B
rs1948019	2	139384390	139532343	139667920	139815873	0.00211731	0.913182
rs2113417	2	95363583	95700485	95999856	96336758	0.0021191	0.913182	FABP7P2;UBTFL5;TRIM43B;UBTFL3;PROM2;KCNIP3;FAHD2A;TRIM43;TRNAE31P
rs13256239	8	109854305	110002148	109785129	109932972	0.0021256	0.913182	TMEM74
rs11662739	18	31495598	31635346	33241600	33381348	0.0023092	0.913182	GALNT1
rs4954956	2	139261047	139377714	139544577	139661244	0.00232254	0.913182	NXPH2
rs1598109	4	179039071	179199330	178802077	178962336	0.00246122	0.913182
rs3924647	5	70696612	70892134	70660856	70856378	0.00257734	0.913182	GUSBP9;PMCHL2;HMGN1P12;BDP1;MCCC2
rs11946433	4	46641663	46790470	46946906	47095713	0.00258568	0.913182	COX7B2;GABRA4;GABRB1
rs11933865	4	15984262	16096879	16375164	16487781	0.00263109	0.913182	ZEB2P1;LDB2
rs872580	2	95086636	95222046	95722909	95858319	0.00265401	0.913182	MAL;MRPS5;ZNF514;ZNF2;PROM2
rs13119041	4	48339987	48453748	48645230	48758991	0.00268626	0.913182	FRYL;OCIAD1;RNU5E-3P
rs2234618	3	38384582	38495655	38409578	38520651	0.00282345	0.913182	RPL18AP7;SLC22A13;SLC22A14;XYLB;ACVR2B;EXOG;SCN5A
rs2354315	4	48457233	48576198	48762476	48881441	0.00285606	0.913182	OCIAD2;FRYL;OCIAD1
rs2771064	9	102960399	103081829	103920578	104042008	0.00288372	0.913182	BAATP1;FYTTD1P1;BAAT
rs6714731	2	72111927	72236097	72258419	72382589	0.00293416	0.913182	CYP26B1;EXOC6B
rs6576970	2	94849294	95085904	95485567	95722177	0.00294093	0.913182	CNN2P11;CNN2P8;CYP4F32P;SNX18P14;ANKRD20A8P;TEKT4;MAL;MRPS5;ZNF514
rs6898933	5	56023879	56170033	55988122	56134276	0.00300315	0.913182	MAP3K1;C5orf35;MIER3
rs2703376	8	110678457	110832089	110609281	110762913	0.00304175	0.913182	PKHD1L1;EBAG9;SYBU
rs2533353	7	153077647	153253595	153446714	153622662	0.00310298	0.913182	DPP6
rs3749249	3	198929608	199065335	197445211	197580938	0.00314579	0.913182	KIAA0226;FYTTD1;LRCH3;IQCG;RPL35A;MIR922
rs12567202	1	86410253	86560355	86637665	86787767	0.00329704	0.913182	COL24A1;ODF2L
rs6746811	2	98774333	98942147	99407901	99575715	0.00334655	0.913182	YWHAQP5;MGAT4A;C2orf55;TSGA10;RNU7-46P
rs9648757	7	152918893	153068357	153287960	153437424	0.00334979	0.913182
rs2290909	2	96399831	96602497	97036104	97238770	0.00352082	0.913182	NEURL3;FER1L5;CIAO1;SNRNP200;ITPRIPL1;NCAPH;ARID5A;KIAA1310
rs8096202	18	31334098	31484044	33080100	33230046	0.00353015	0.913182	INO80C;GALNT1
rs4370987	12	2365187	2440796	2494926	2570535	0.00356916	0.913182	CACNA1C-IT3;CACNA1C
rs185733	5	70897815	71042463	70862059	71006707	0.00360634	0.913182	HMGN1P12;BDP1;MCCC2;CARTPT
rs9867722	3	199065808	199209015	197581411	197724618	0.00362701	0.913182	LMLN-AS1;FYTTD1;LRCH3;IQCG;RPL35A;LMLN
rs6605312	3	199210692	199322659	197726295	197838262	0.00362701	0.913182	LMLN-AS1;IQCG;RPL35A;LMLN;FAM157A
rs13236171	7	152583406	152685206	152952473	153054273	0.00364215	0.913182
rs3899434	2	89791932	94842710	89791932	94842710	0.00366359	0.913182	IGKV2D-40;IGKV1D-39;IGKV2D-38;IGKV1D-37;IGKV2D-36;IGKV1D-35;IGKV3D-34;IGKV1D-33;IGKV1D-32;IGKV3D-31;IGKV2D-30;IGKV2D-29;IGKV2D-28;IGKV1D-27;IGKV2D-26;IGKV3D-25;IGKV2D-24;IGKV2D-23;IGKV1D-22;IGKV6D-21;IGKV3D-20;IGKV2D-19;IGKV2D-18;IGKV6D-41;IGKV1D-17;IGKV1D-16;IGKV3D-15;IGKV2D-14;IGKV1D-13;IGKV1D-12;IGKV3D-11;IGKV2D-10;IGKV1D-42;IGKV1D-43;IGKV1D-8;IGKV3D-7;GGT8P;ABCD1P5;PABPC1P6;ACTR3BP2;RN5S100
rs2586536	17	7038090	7083381	7097366	7142657	0.00367869	0.913182	ASGR2;ASGR1;DLG4;ACADVL;DVL2;PHF23;GABARAP;CTDNEP1;C17orf81;CLDN7;SLC2A4;YBX2;EIF5A;GPS2;NEURL4;ACAP1;MIR324
rs4972626	2	174563004	174677446	174854758	174969200	0.00372231	0.913182	SP3;OLA1
rs6749957	2	21536790	21704207	21683285	21850702	0.00373467	0.913182
rs7587149	2	96866527	96941388	97502800	97577661	0.00374249	0.913182	LMAN2L;CNNM4;CNNM3;ANKRD23;ANKRD39;SEMA4C;FAM178B;RN5S101
rs800518	8	116870956	117031320	116801780	116962142	0.00375197	0.913182	TRPS1
rs1042267	7	127820066	127966580	128032830	128179344	0.00381972	0.913182	RBM28;PRRT4;IMPDH1;C7orf68;METTL2B;RNU7-27P;RNU7-54P
rs4287498	15	57335519	57442870	59548227	59655578	0.00385286	0.913182	MYO1E;LDHAL6B;FAM81A;MIR2116
rs9625575	22	27534886	27712386	29204886	29382386	0.00385469	0.913182	ZNRF3-IT1;ZNRF3-AS1;CHEK2;HSCB;CCDC117;XBP1;ZNRF3;C22orf31;KREMEN1
rs7779266	7	127987388	128149662	128200152	128362426	0.00395388	0.913182	METTL2B;FAM71F2;FAM71F1;CALU;OPN1SW;CCDC136
rs2140899	7	154222399	154292105	154591466	154661172	0.00401526	0.913182	DPP6;PAXIP1
rs526770	6	75129844	75318359	75073124	75261639	0.00405734	0.913182
rs17739370	4	178532423	178614521	178295429	178377527	0.0040819	0.913182	NEIL3;AGA
rs7186179	16	56265333	56337657	57707832	57780156	0.00418448	0.913182	GPR114;GPR56;GPR97;CCDC135;KATNB1;KIFC3
rs4647313	7	142704663	142764431	142994541	143054309	0.00418942	0.913182	HINT1P1;TAS2R62P;TAS2R40;GSTK1;TMEM139;CASP2;CLCN1;FAM131B;ZYX;EPHA1;TAS2R60
rs11861952	16	2502128	2653730	2562127	2713729	0.00420367	0.913182	CCNF;C16orf59;NTN3;TBC1D24;ATP6V0C;AMDHD2;CEMP1;PDPK1;KCTD5;PRSS27;SRRM2;ABCA17P
rs2314109	2	96607259	96735685	97243532	97371958	0.00423514	0.913182	NEURL3;FER1L5;ARID5A;KIAA1310;LMAN2L;CNNM4
rs16886420	5	56178756	56274354	56142999	56238597	0.00426723	0.913182	MAP3K1;C5orf35;MIER3
rs2768969	4	48738682	52408807	48738682	52408807	0.00426736	0.913182	TPI1P4;SNX18P23;SNX18P24;SNX18P25;OCIAD2;CWH43;FRYL;OCIAD1
rs4667324	2	149635312	149722342	149927066	150014096	0.00431474	0.913182	KIF5C;LYPD6B
rs1330150	9	109584228	109730122	110544407	110690301	0.00434043	0.913182	RPL36AP6
rs11924649	3	169297948	169462379	167815254	167979685	0.00435901	0.913182	EGFEM1P;GOLIM4
rs35286648	22	27191979	27440002	28861979	29110002	0.00437736	0.913182	TTC28;CHEK2;HSCB;CCDC117;XBP1
